# Supplementary material for: Ganglion-specific splicing of TRPV1 underlies infrared sensation in vampire bats
Source: Springer Nature journal article supplement (doi:10.1038/nature10245), 2011-08-01
Supplement: 41586_2011_BFnature10245_MOESM246_ESM.pdf [file 41586_2011_BFnature10245_MOESM246_ESM.pdf]

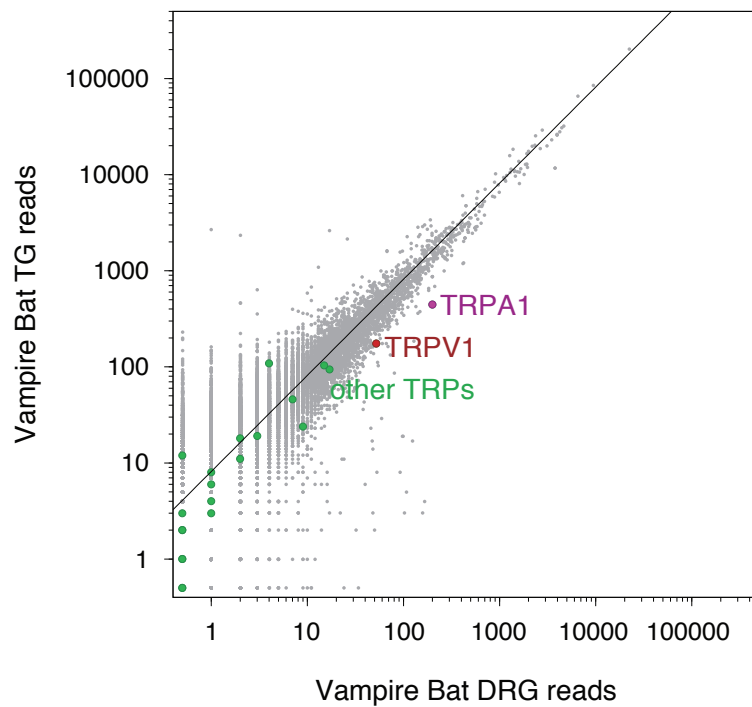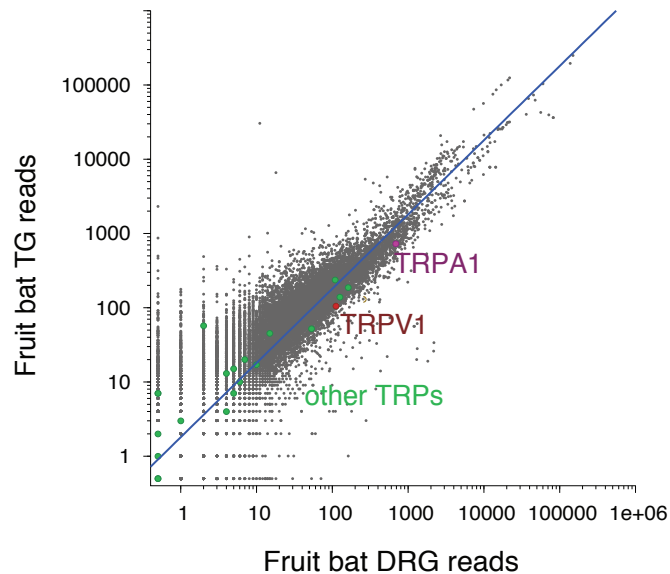

**Supplementary Figure 1**

## Transcriptome profiling of vampire bat and fruit bat sensory ganglia

Number of mRNA-seq reads from sensory ganglia of vampire bat (*Desmodus rotundus*, top) and fruit bat (*Carollia brevicauda*, bottom) ganglia that align to the cow proteome. Blue line indicates expected number of sequencing reads for genes with similar expression levels in the two samples based on the total number of aligned reads from each.

```

1 mkkrgssdsqesedlpqedsldpdlgqphsrpapaksnilmakrrrlfkgkdseesapqdcsykeghpascpaitvsvpltvqktedgptctwqlcqsdpagtkkcklydrkifeavaqnnceel
1 mkkrgssdsqesedlpqedsldpdlgqphsrpapakpniprtakrsrlfkgkdseesaldcsykeqcpascpaitvsvplmvqktedgptctwqlcqsdpagtkkcklydrkifeavaqnnceel
131 eslllflqskkhlmrdrefkdpetgkctcllkamlnlhngqntipllleiarqtdskelvnasytdsyykgqtahiaierzrmalvtllvengadvqaaangdffkktkgrpgfyfgelplslaactn
131 eslllflqskkhlmrdsefkdpetgkctcllkamlnlhngqntipllleiarqtdskelvnasytdsyykgqtahiaierzrmalvtllvengadvqaaangdffkktkgrpgfyfgelplslaactn
261 qlgivkflilqnsqpadisardsvngntvlhalvevadntadntkfvtsmyneillgalkhptlkleelinkkgltplalaassgkigvlayilqreihepecrylsrkftewaygpvhsslydlsctid
261 qlgivkflilqnsqpadisardsvngntvlhalvevadntadntkfvtsmyneillgalkhptlkleelinkkgltplalaassgkigvlayilqreihepecrhlrskftewaygpvhsslydlsctid
391 ceknsvleviaysnetpnrhdmllveplnrllqdkwdrfvkriifyfnffvyclymifftvayyrpveglppykvkhtvgdyfrvigeilsvlggvyyfffrgigylqrpelkslfvdsyseilffvq
391 ceknsvleviaysnetpnrhdmllveplnrllqdkwdrfvkriifyfnffvyclymifftvayyrpveglppykvkhtvgdyfrvigeilsvlggvyyfffrgigylqrpelkslfvdsyseilffvq
521 slfmlgtvvllyfcqckeyvasmvfslamgwtmlyytrgfqqmgiyavmiekmilrdlorfmfvyllflfgfstavvtliedgkndsvstettphrwrqpcyrpdsynslystclelftkftigmgle
521 slfmlgtvvllyfcqckeyvasmvfslamgwtmlyytrgfqqmgiyavmiekmilrdlorfmfvyllflfgfstavvtliedgkndsvstettphrwrqpcyrpdsynslystclelftkftigmgle
651 ftenydfkavfiilllayviltyilllnmlialmgetvnkiaqesknwklqraitildteksflkcmrkafregkllqvgypdgkddyrcwfrvdevnwtntnvgiinedpgncegikrtlfsflr
651 ftenydfkavfiilllayviltyilllnmlialmgetvnkiaqesknwklqraitildteksflkcmrkafregkllqvgypdgkddyrcwfrvdevnwtntnvgiinedpgncegikrtlfsflr
781 ssvagrwnknfalvpllldastrerqpaqpeevhkhfsgslkpedaxvfkdsaalgesekgestv
781 ssvagrwnknfalvpllldastrerqpaqpeevhkhfsgslkpedaevfkdpaalg-----

```

Top: Vampire bat (*Desmodus rotundus*) TRPV1-L  
 Bottom: Fruit bat (*Carollia brevicauda*) TRPV1-L

Supplementary Figure 2

Protein sequence alignment for vampire bat (*Desmodus rotundus*, top) and fruit bat (*Carollia brevicauda*, bottom) TRPV1-L isoforms.

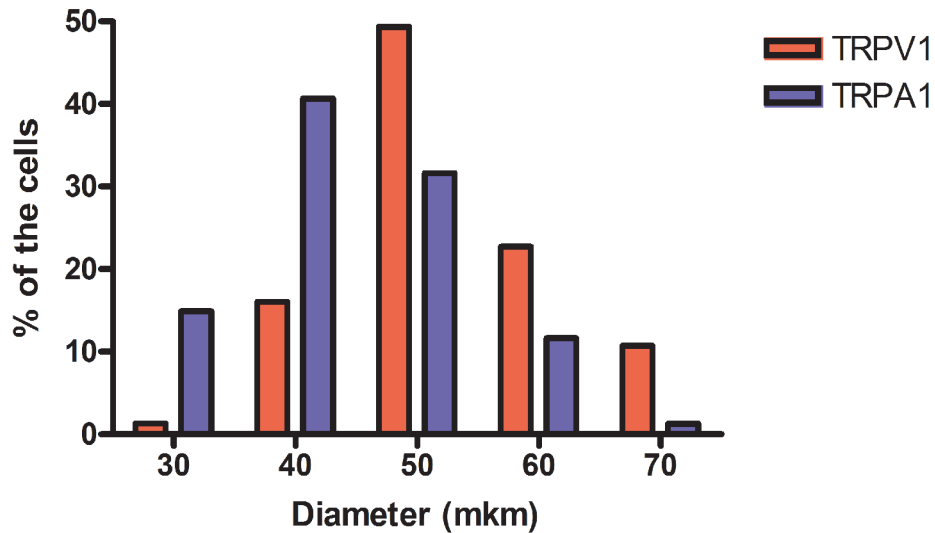

Supplementary Figure 3

Neuronal size distribution of TRPV1-positive and TRPA1-positive neurons in trigeminal ganglia of vampire bats detected by *in situ* hybridization histochemistry of frozen tissue sections.

| TRPV1               | $Q_{10}$       | $Q_{10}$      | Temperature threshold (°C) |
|---------------------|----------------|---------------|----------------------------|
| Vampire bat (Short) | $5.1 \pm 0.8$  | $1.4 \pm 0.1$ | $31.2 \pm 1.5$             |
| Vampire bat (Long)  | $11.5 \pm 1.2$ | $1.6 \pm 0.1$ | $40.2 \pm 0.7$             |
| Short:Long (1:1)    | $5.7 \pm 1.3$  | $1.4 \pm 0.1$ | $33.9 \pm 1.2$             |
|                     |                |               |                            |
| Zebrafish           | $4.6 \pm 0.5$  | $1.4 \pm 0.1$ | $32.9 \pm 1.2$             |
| Fruit bat (Short)   | $5.1 \pm 1.2$  | $1.4 \pm 0.3$ | $30.8 \pm 2$               |
| Fruit bat (Long)    | $9.9 \pm 1.4$  | $1.5 \pm 0.2$ | $40 \pm 0.5$               |
| Cow (Long)          | $16 \pm 1.7$   | $1.6 \pm 0.3$ | $40.5 \pm 0.6$             |
| Mole (Short)        | $4.4 \pm 0.5$  | $1.5 \pm 0.3$ | $31.3 \pm 1.1$             |
| Mole (Long)         | $7.5 \pm 0.6$  | $1.7 \pm 0.2$ | $38.3 \pm 0.9$             |
| Rat                 | $21.7 \pm 1.1$ | $1.3 \pm 0.1$ | $42.3 \pm 1.2$             |

#### Supplementary Figure 4

##### Thermal properties of cloned TRPV1 channels

TRPV1 cDNAs expressing short or long channel isoforms from various organisms (as indicated) were expressed in oocytes and subjected to temperature ramps while recording membrane currents in two-electrode voltage-clamp mode ( $V_h = -80$  mV). Temperature coefficient ( $Q_{10}$ ) for baseline and steepest component of the heat-evoked current and activation thresholds were derived from Arrhenius plots, as described in Methods.

## Vampire bat TRPV1-S isoform

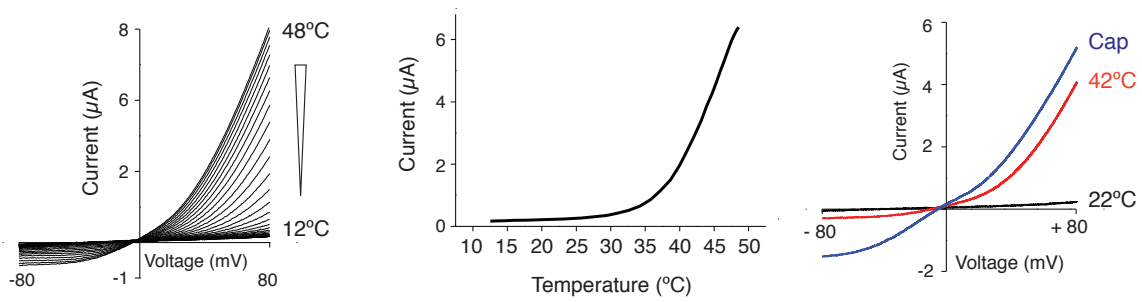

## Vampire bat TRPV1-L isoform

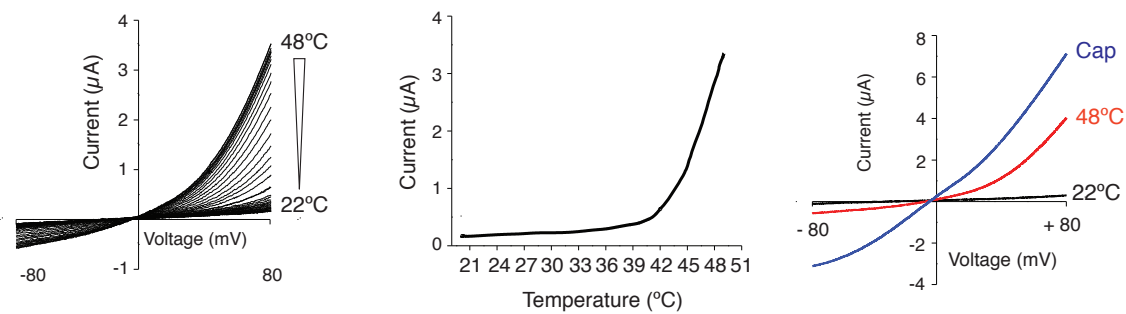

## Vampire bat TRPV1-S:TRPV1-L = 1:1

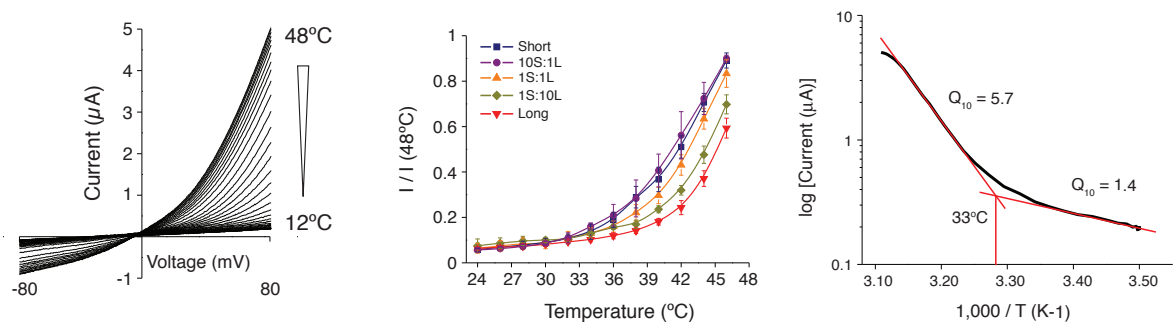

Supplementary Figure 5

## Functional analysis of vampire bat TRPV1 channel isoforms

Data are shown for oocytes expressing vampire bat (*D. rotundus*) TRPV1-S, TRPV1-L, or both, as indicated. In each case, left panel shows representative current-voltage relationships for heat-evoked responses during temperature ramp; middle panel shows temperature-response relationship; right panel shows representative current-voltage relationships for heat and capsaicin (10  $\mu$ M)-evoked responses, or Arrhenius plot showing thermal threshold and  $Q_{10}$  values for baseline and evoked responses. All data were collected in two-electrode voltage-clamp mode ( $V_h = -80$  mV).

Fruit bat TRPV1-S isoform

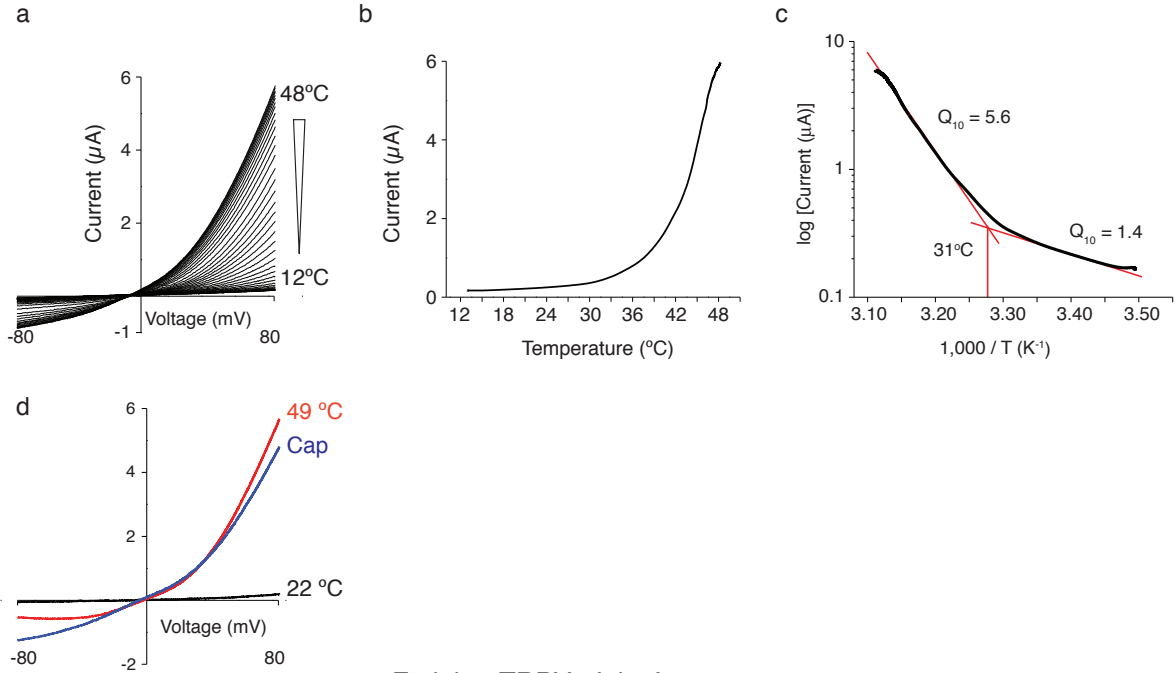

Fruit bat TRPV1-L isoform

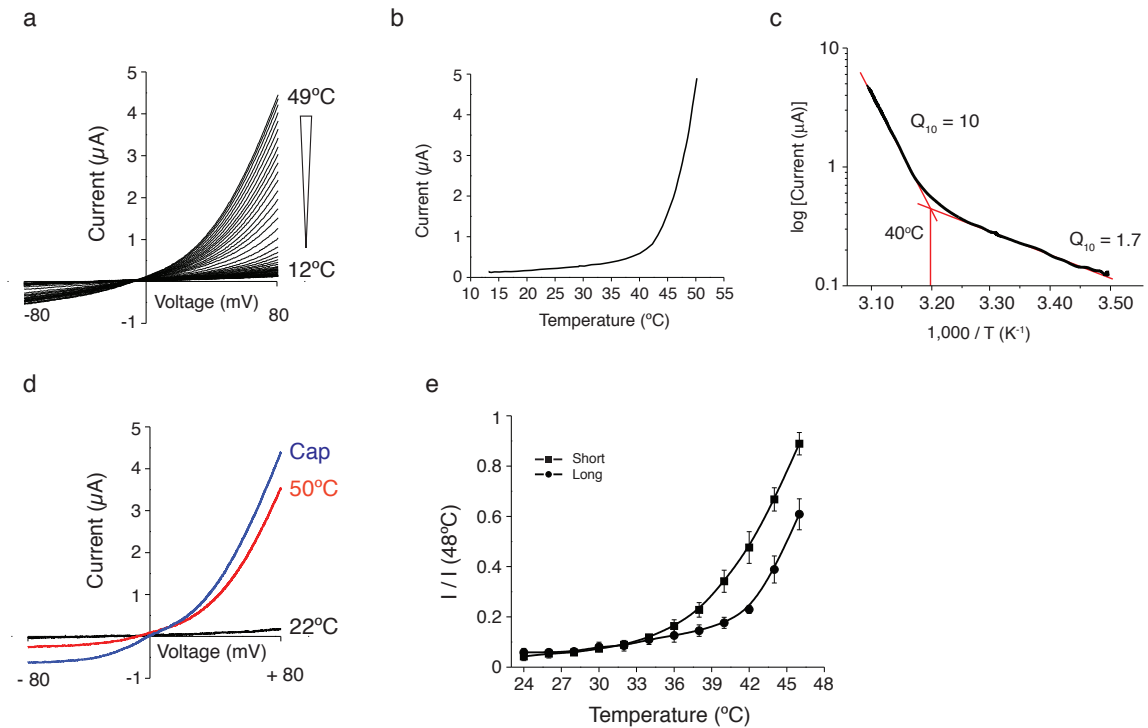

Supplementary Figure 6

Functional analysis of fruit bat TRPV1 channel isoforms

Data are shown for oocytes expressing fruit bat (*C. brevicauda*) TRPV1-S, TRPV1-L, or both, as indicated. In each case, panel a shows representative current-voltage

relationships for heat-evoked responses during temperature ramp; panel **b** shows temperature-response relationship; panel **c** shows Arrhenius plot showing thermal threshold and  $Q_{10}$  values for baseline and evoked responses; panel **d** shows representative current-voltage relationships for heat and capsaicin ( $10 \mu\text{M}$ )-evoked responses; panel **e** compares average temperature-response relationships for short and long TRPV1 isoforms.

All data were collected in two-electrode voltage-clamp mode ( $V_h = -80 \text{ mV}$ ).

### Vampire bat TRPA1

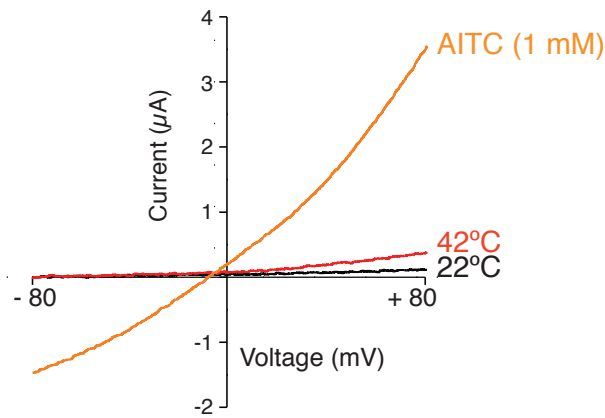

### Fruit bat TRPA1

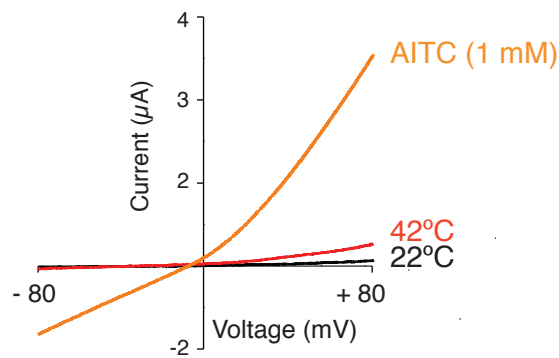

**Supplementary Figure 7**

#### **Functional analysis of vampire and fruit bat TRPA1 channels**

Thermal and chemical sensitivities of cloned vampire (*D. rotundus*) and fruit (*C. brevicauda*) bat TRPA1 channels, as indicated. Current-voltage relationships were determined by two-electrode voltage clamp recording of TRPA1-expressing oocytes challenged with heat (42°C) or AITC (1 mM).





|                       |                                                    |      |
|-----------------------|----------------------------------------------------|------|
| Desmodus rotundus     | TCTTTTCATT--TTTGTTTTTCAGCAGTTTGACTAAGATGTA         | 2154 |
| Carollia brevicauda   | TCTTTTCATT--TTTGTTTTTCAGCAGTTTGACTAAGATGTGCTTAGGTA | 2398 |
| Pteropus vampyrus     | -----ATTGATA-----TTAGG--                           | 1039 |
| Pteropus rodricensis  | -----ATTGATA-----TTAGG--                           | 1039 |
| Rousettus aegyptiacus | -----ATTGATA-----TTAGG--                           | 1037 |
| Bos taurus            | TCTCTTCATCTTTTTGGTTTTTCAGCATTGACTAAAACGTGCTTAGGTA  | 3101 |
| Equus caballus        | -----TTCAGTAGTTTACTGAGATGTGCTCAGGTA                | 1186 |
| Sus scrofa            | TCTCTTCATC--TTTGTTTTTCAGCAGTTTACTAAGA-AACTTAGGGG   | 2300 |
| Canis familiaris      | TCTCTTCATT--TTTGTTTTTCAGCAGT----CTAAAATGTACTTAGGTT | 2958 |
| Scapanus orarius      | -----                                              | 1465 |

**Supplementary Figure 9**

**Alignment of exon 14a from microbats with intronic region of other mammals**

The region encoding exon 14a in vampire (*D. rotundus*) and fruit (*C. brevicauda*) bats is highlighted. Splice acceptor (-AG-) and donor (-GT-) sites are highlighted in green and grey, respectively. Numbers at right indicate relative distance from exon 14 (position 1 corresponds to 12 nucleotides from the end of exon 14 in all species shown). Dashes indicate regions of non-identity.

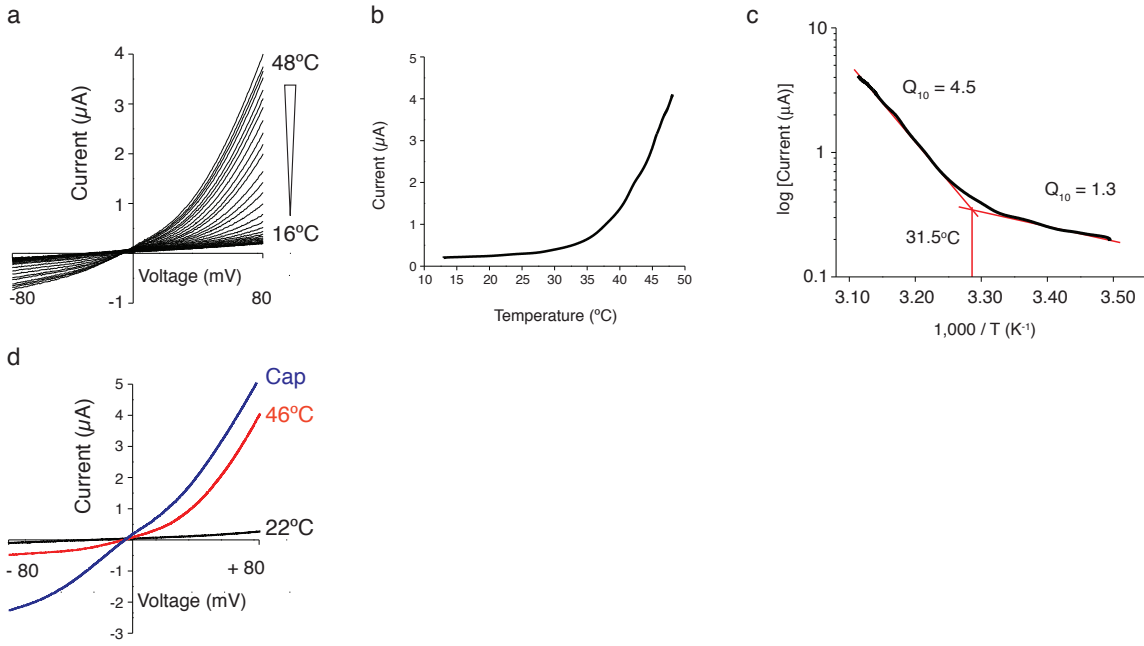

Coast mole TRPV1-L isoform

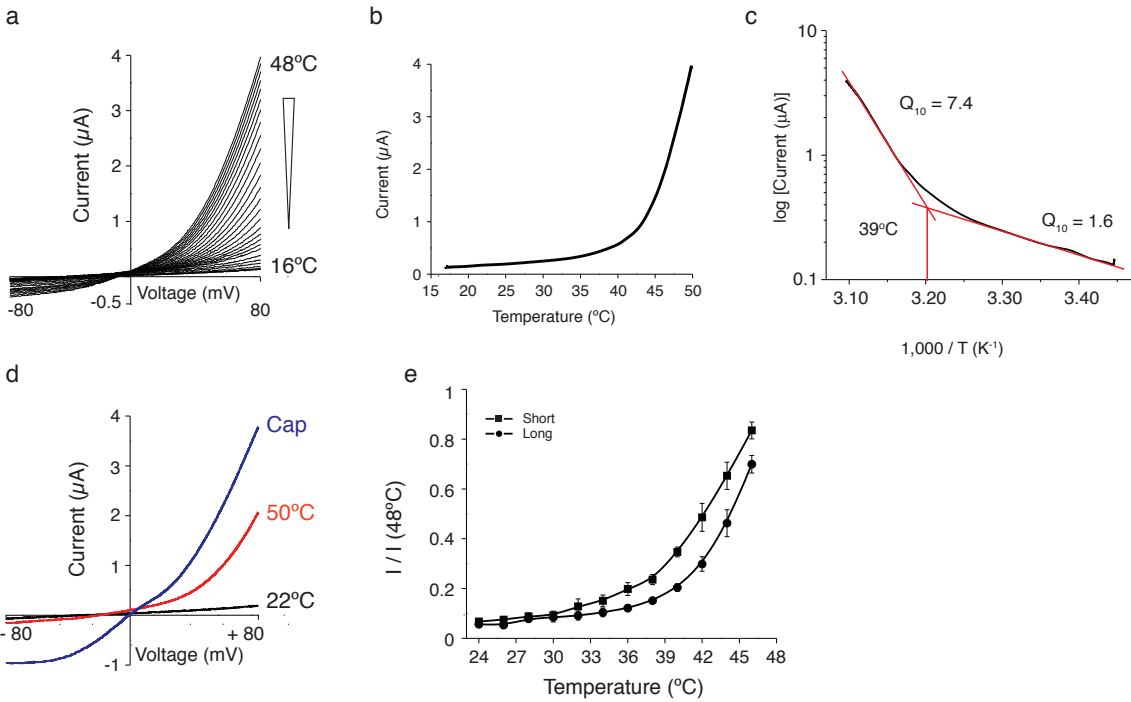

Supplementary Figure 10

Functional analysis of Coast mole TRPV1 channel isoforms

Data are shown for oocytes expressing Coast mole (*Scapanus orarius*) TRPV1-S or TRPV1-L isoforms, as indicated. In each case, panel a shows representative current-

voltage relationships for heat-evoked responses during temperature ramp; panel **b** shows temperature-response relationship; panel **c** shows Arrhenius plot showing thermal threshold and  $Q_{10}$  values for baseline and evoked responses; panel **d** shows representative current-voltage relationships for heat and capsaicin (10  $\mu\text{M}$ )-evoked responses. Panel **e** in bottom group compares average temperature-response relationships for short and long TRPV1 isoforms. All data were collected in two-electrode voltage-clamp mode ( $V_h = -80$  mV).

Cow TRPV1-L isoform

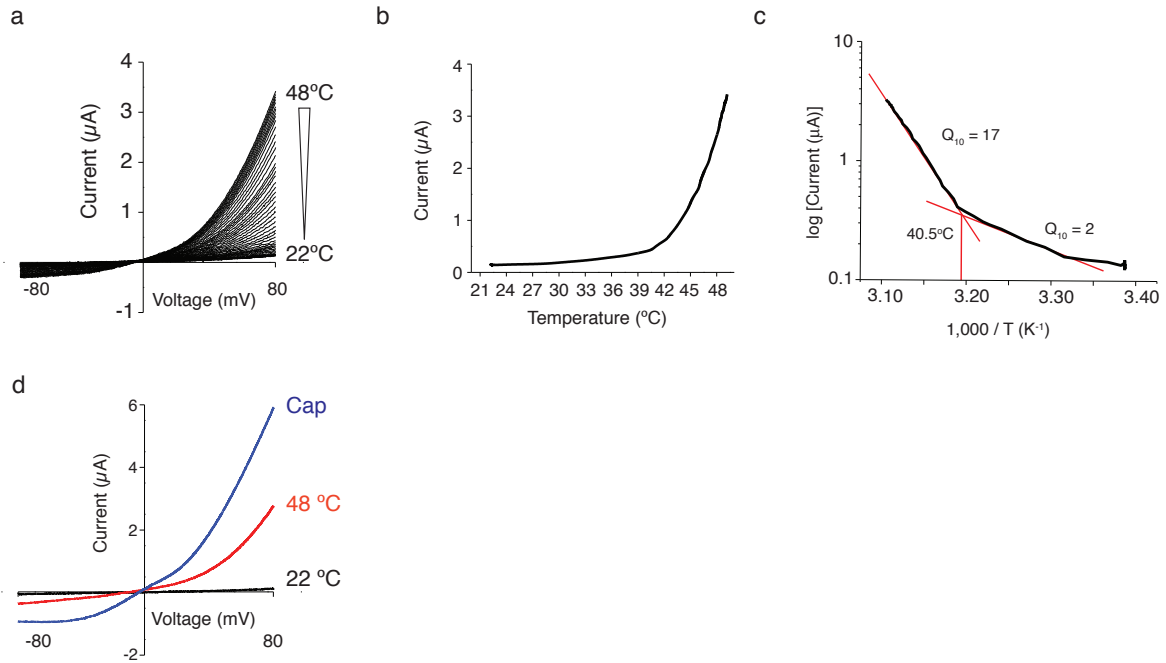

Cow TRPV1-XL isoform

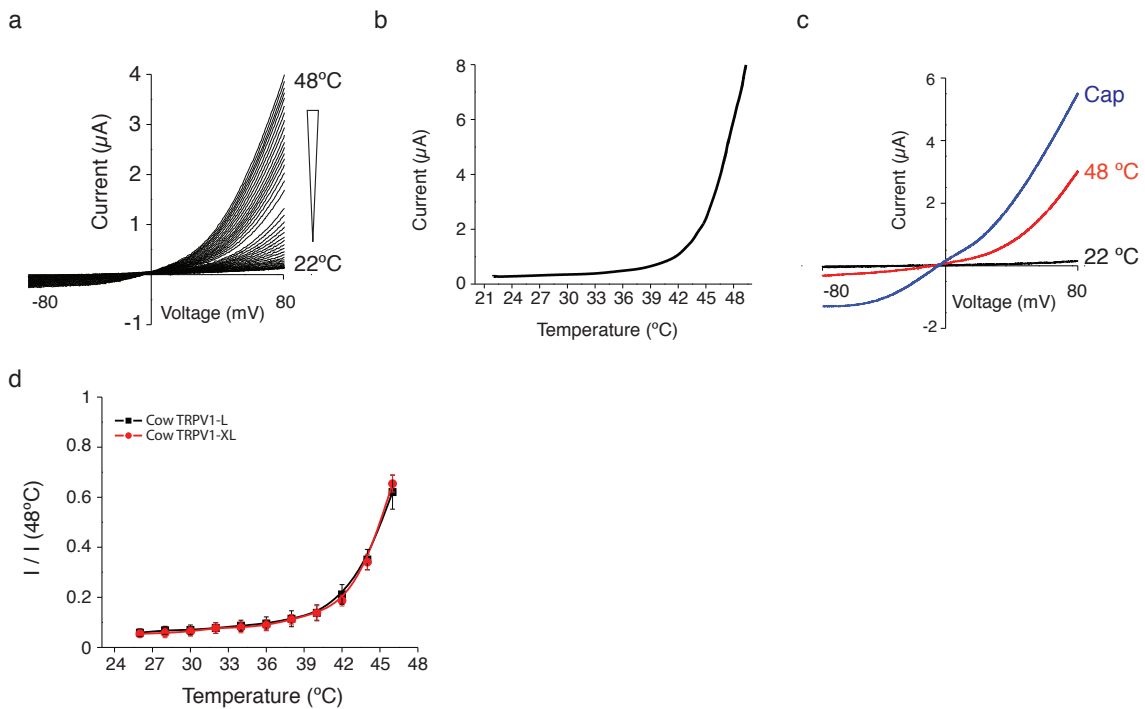

Supplementary Figure 11

Functional analysis of bovine TRPV1 channel isoforms

Data are shown for oocytes expressing cow (*Bos taurus*) TRPV1-L or TRPV1-XL isoforms, as indicated. For TRPV1-L, panel a shows representative current-voltage

relationships for heat-evoked responses during temperature ramp; panel **b** shows temperature-response relationship; panel **c** shows Arrhenius plot showing thermal threshold and  $Q_{10}$  values for baseline and evoked responses; panel **d** shows representative current-voltage relationships for heat and capsaicin (10  $\mu\text{M}$ )-evoked responses. For TRPV1-XL panel panel **a** shows representative current-voltage relationships for heat-evoked responses during temperature ramp; panel **b** shows temperature-response relationship; panel **c** shows representative current-voltage relationships for heat and capsaicin (10  $\mu\text{M}$ )-evoked responses; panel **d** compares average temperature-response relationships for short and long TRPV1 isoforms. All data were collected in two-electrode voltage-clamp mode ( $V_h = -80 \text{ mV}$ ).

|                       |                                                           |      |
|-----------------------|-----------------------------------------------------------|------|
| Desmodus rotundus     | ----GGCAGGCACAGGAGGGAAGGACAGGAAGAGTGAAGGGTACACCTT         | 452  |
| Carollia brevicauda   | ----GGCAGGTACAGGAGGTAAGAACGAGAAGAGTAAAGGGTACACCTT         | 454  |
| Pteropus vampyrus     | --CCAGGTAGGCAGAGGAGGGGAATGGGA-CAGTAAAGGGTACACCTT          | 466  |
| Pteropus rodricensis  | --CCAGGTAGGCAGAGGAGGGGAATGGGA-CAGTAAAGGGTAAACCTT          | 466  |
| Rousettus aegyptiacus | --CCAGGTAGGCAGAGGAGGCAATGGGA-GAGTAAAGGGTGACCTT            | 465  |
| Bos taurus            | -----TTCACACGCAGGCAGGC--AGAGGAGGGAAGGT----GG              | 354  |
| Equus caballus        | AGCCAGGCAGGCAGAGGAGGGAAGATGGGACGAGTAAAGGGTACATCTT         | 477  |
| Sus scrofa            | -----GTGCAGAGGAGGGAAGGGTGGGAGGGGGCCAGGGTACACCTT           | 374  |
| Canis familiaris      | ----ATCCAGCTGGCAGA-GGAAGAAATGGGAAGAGTAAACGAGTATATCAT      | 473  |
| Scapanus orarius      | -GTCTGTAGGGAGAGGAGGGAAGAGTGGGAGGAGGAGGGTACATCTG           | 469  |
|                       |                                                           |      |
| Desmodus rotundus     | -GAGCAGAAAAGCCCTGCAGAAAATCACTACCAGAAAA-AAGTCCTTTAA        | 500  |
| Carollia brevicauda   | -GAGCAGAAAAGCCCTGCAGAAAATCACTACCAGAAAA-AAGTTGTTTAA        | 502  |
| Pteropus vampyrus     | -GAGTGGAAAAGTCTCGCGAAAATCACTACCAGAAAAAAGTCCCTTTAC         | 515  |
| Pteropus rodricensis  | -GAGTGGAAAAGTCTCGCGAAAATCACTACCAGAAAAAAGTCCCTTTAC         | 515  |
| Rousettus aegyptians  | -GAGTGGAAAAGTCTCGCGAAAATCACTACCAGAAAAAAGTCCCTTTAC         | 514  |
| Bos taurus            | <b>-GAGCAGAGGAGCCCTGCGGAGAACCACTACCAGAAACCAAGTCTTTAAA</b> | 403  |
| Equus caballus        | -GGACAGAACAGCCCTGCGGAAAAGTCACTGCCAGAAAACAAAAGCCTTGT-      | 525  |
| Sus scrofa            | -GAACCGAAGCCCTGCGGAAAATCACTACCAGAAA-A-A-GTCCTTTAA         | 420  |
| Canis familiaris      | AAAGCAGAAATGCTCTGCAGAAAATCACTACCAGAAAAAAGTCCCTTTAA        | 523  |
| Scapanus orarius      | -GAGCAGAAACAGTCTGAGGAAAATCATTAGTGGAAAG-AAGTCCTTTGAA       | 517  |
|                       |                                                           |      |
| Desmodus_rotundus     | TTTTAAG-CTT-TATT-----ATGGTAGATCTG-TGGACACTCC              | 3015 |
| Carollia_brevicauda   | TTTTAAG-CTT--TT-----ATGGTAGATCTG-TGGACACTCC               | 3257 |
| Pteropus_vampyrus     | TTTTAAC-CTT-TATT-----ATGGTAGATCTG-TAGACACTAC              | 1745 |
| Pteropus_rodricensis  | TTTTAAC-CTT-TATT-----ATGGTAGATCTG-TAGACACTAC              | 1745 |
| Rousettus_aegyptiacus | TTTTAAG-CTT-TATT-----ATTGTAGATCTG-TGGACACTAC              | 1747 |
| Bos_taurus            | CTTTAGC-ATTTAATT-----ATGGTAGATCTG-TGGAAATGTC              | 3918 |
| Equus_caballus        | TTTTAAA-CTT-TATT-----ATGATAGATCTGT-TGGAAATGCC             | 1921 |
| Sus_scrofa            | TTTTAAA-GTT-TATT-----TTAGTAGATATGT-TGGAAATGCC             | 3008 |
| Canis_familiaris      | TTTTAAA-CTT-TATT-----ATGGTAGATATG-TG-AAATGCC              | 3887 |
| Scapanus_orarius      | TTTTTATATT-CATCAACTGATTTTATTTTATTTTTTTTGG-AGAACAG         | 2137 |
|                       |                                                           |      |
| Desmodus_rotundus     | AAGGT---ATTTGCTAATCCCATAAAACCTTGT--GGGACTCAGCC---         | 3055 |
| Carollia_brevicauda   | AAGGT---ATTTGCTGATCCCATAAAACCTTTT--GGGACTCAGCC---         | 3297 |
| Pteropus_vampyrus     | AAGAT---ATTTGCTAATCTCATCAAACCTTGT--GGGATTCAGCC---         | 1785 |
| Pteropus_rodricensis  | AAGAT---ATTTGCTAATCTCATCAAACCTTGT--GGGATTCAGCC---         | 1785 |
| Rousettus_aegyptiacus | AAGAT---ATTTGCTAATCTCATCAAGCTTGT--GGGATTCAGCC---          | 1787 |
| Bos_taurus            | AAGAT---GTTTCAATCCCATCAAACCTTGT--GGGACTCAACC---           | 3958 |
| Equus_caballus        | GAGGT---GTTGCGAGTCCCATCAAGCTGTT--GGGATTCAAC---            | 1961 |
| Sus_scrofa            | AAGGT---ATTAGCCAATCCCATCAAAC-----TCAACC---                | 3039 |
| Canis_familiaris      | AAAGT---ATTTGCCAATCCCATAAAACCTTTT--GGGACTCAACC---         | 3927 |
| Scapanus_orarius      | <b>AAAAGGCGGATTAT---TGAAATACACTGCTAAGAGAAGCAGCGGGCC</b>   | 2183 |
|                       |                                                           |      |
|                       |                                                           |      |
| Desmodus_rotundus     | GTGAGTCTTGAG-T-AGTCTTACTCTA-GG----TTATGTAGAGTA--          | 3147 |
| Carollia_brevicauda   | GTGAGTCTTGAG-T-AGCCCTTACTCTA-GG----TTATGTAGAGTA--         | 3389 |
| Pteropus_vampyrus     | GTGGGTCTTAAG-TTAAACCTTACCCTA-GG----GCATGCAAAGTA--         | 1878 |
| Pteropus_rodricensis  | GTGGGTCTTAAG-TTAAACCTTACCCTA-GG----GCATGCAAAGTA--         | 1878 |
| Rousettus_aegyptiacus | GTGGGTCTTAAG-TTAAACCTTACCCTA-GG----GCATGCAAAGTA--         | 1880 |
| Bos_taurus            | GTGGGTCTTGAG-T-AGACCTTATTCTAG-T----GTGTATAGAGTA--         | 4189 |
| Equus_caballus        | GTGGGTCTTGAG-T-AGAACTTACTCTAG-G----GC-TGTAGAGTA--         | 2055 |
| Sus_scrofa            | GTGGATCTTGAG-T-AGCTCTTGTCTAG-T----GCTTATAGAGTA--          | 3134 |
| Canis_familiaris      | GTGGGTCCCTCA-T-AGACCTTACTATA-GG----TACATAGAGTA--          | 4021 |
| Scapanus_orarius      | <b>AACCTTTATTAAGAT-ATACTTACTACAAAATACACACATTAAATGTA</b>   | 2293 |
|                       |                                                           |      |
| Desmodus_rotundus     | -CGTGGGGGC-ATTTCTGGTAT-T-TTA-----GCTTAAT----              | 3178 |
| Carollia_brevicauda   | -CGTGG-GGC-ATTTCTGGTAT-T-TTA-----GCTTAAT----              | 3419 |
| Pteropus_vampyrus     | -AGTAG-GGC-ATTTTTAGTAT-T-TTG-----TCTAGATCC---             | 1910 |
| Pteropus_rodricensis  | -AGTAG-GGC-ATTTTTAGTAT-T-TTG-----TCTAGATCC---             | 1910 |
| Rousettus_aegyptiacus | -AGTAG-GGC-ATTTTTAGTAT-T-TTA-----GCTAGATCC---             | 1912 |
| Bos_taurus            | -AGCAG-GGC-ATTTCTGGTAT-T-TTA-----GCTTGATCC---             | 4221 |
| Equus_caballus        | -AGGAG-GGC-ATTTCTGGCGT-C-TCA-----GTTTGATCC---             | 2087 |
| Sus_scrofa            | -AGTAG-TG--ATTTCTGATGT-TTTTA-----ACTTGGTTC---             | 3166 |
| Canis_familiaris      | -AGTAG-GGC-ATTTCTGGTAT-TTTTA-----GCCTGATC---C             | 4054 |
| Scapanus_orarius      | <b>TAGTTT-GGTAAGTTTCAGCAAATATACACTCAGGTAACCTCCATCTCAC</b> | 2342 |

Supplementary Figure 12

Alignment of exon 14a from cows and moles with intronic region of other mammals

The region encoding exon 14a in cow (*Bos taurus*; panel a) and Coast moles (*Scapanus orarius*; panel b) is highlighted. Splice acceptor (-AG-) and donor (-GT-) sites are highlighted in green and grey, respectively. Numbers at right indicate relative distance from exon 14 (position 1 corresponds to 12 nucleotides from the end of exon 14 in all species shown). Dashes indicate regions of non-identity.

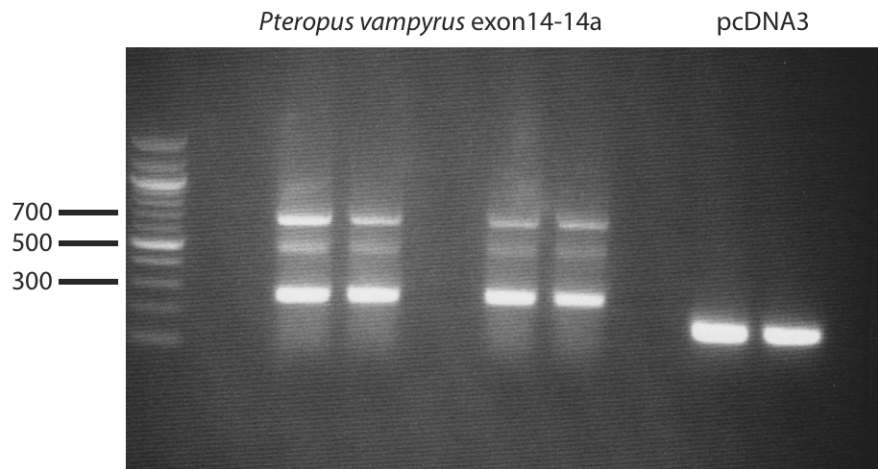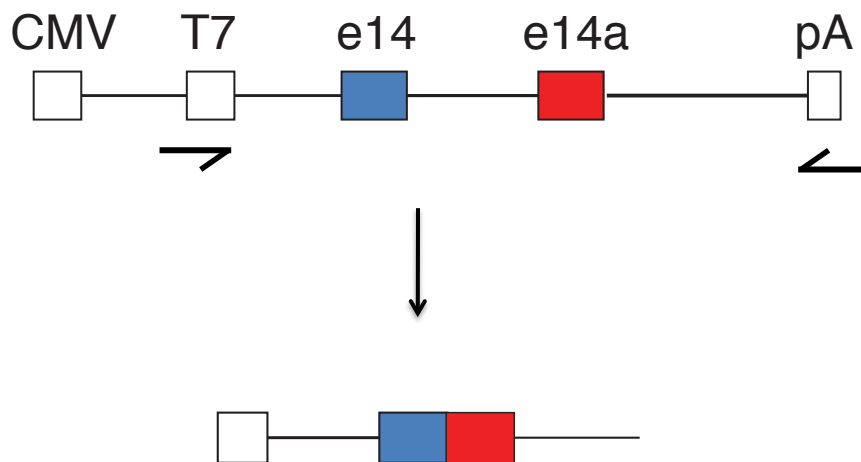

**Supplementary Figure 13**

**In vivo splicing assay suggests presence of TRPV1 exon 14a in megabats**

Diagram shows structure of mini-gene used for in vivo splicing assay in HEK293 cells, indicating location of CMV promoter and polyadenylation site (pA), defining the start and end of the transcribed unit. Transcripts were reverse transcribed using oligo-dT in combination with a primer annealing to T7 promoter to amplify reverse transcripts. Reaction products were resolved on 1.5% agarose gel (shown above with samples run in quadruplicate), and major bands collected for sequencing. Control reaction with vector (pcDNA3) is shown at right. Schematic of major splice product (~300 bp) is shown at bottom.

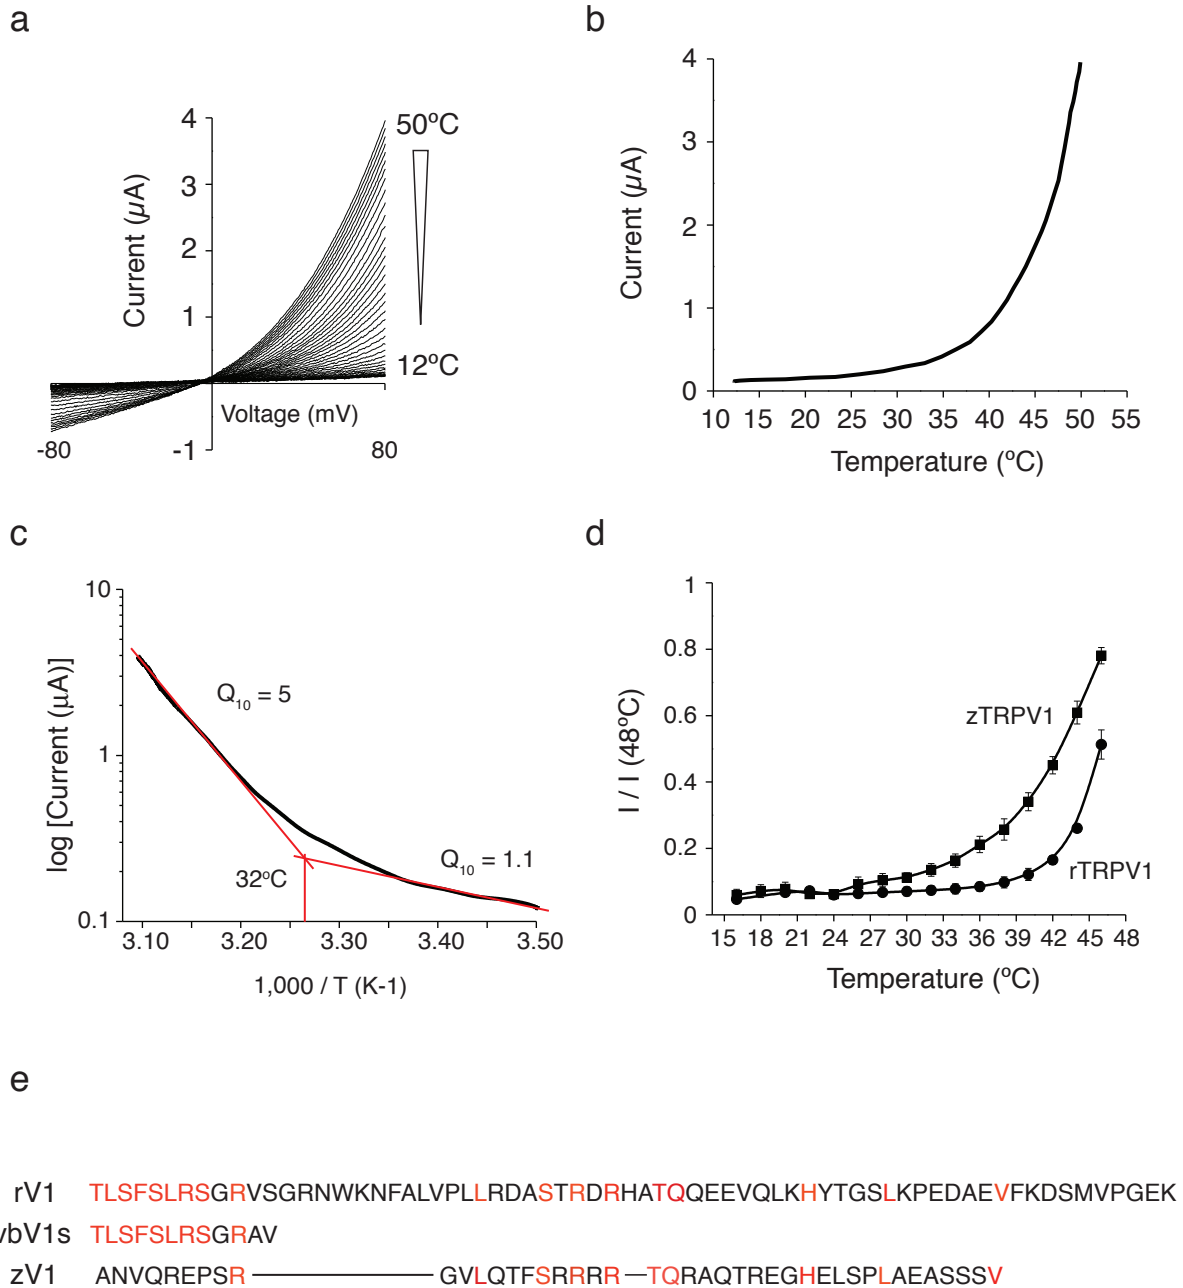

Supplementary Figure 14

Functional characterization and sequence analysis of zebrafish TRPV1

**a-b**, Representative current-voltage and temperature-response relationships for zebrafish TRPV1 channels expressed in oocytes. **c**, Arrhenius plot showing thermal threshold and  $Q_{10}$  values for baseline and evoked responses. **d**, Relative heat response profiles of zebrafish and rat TRPV1 channels expressed in oocytes (holding potential ( $V_h$ ) = -80 mV;  $n \geq 5$ ; mean  $\pm$  s.d.). **e**, Alignment of deduced amino acid sequences for C-terminal domain of rat TRPV1, vampire bat TRPV1-S, and zebrafish TRPV1 channels.



## Global coordinates for bat collection

| Sampling Point | Latitude (N) | Longitude (E) | Meridian |
|----------------|--------------|---------------|----------|
| 1              | 987682       | 600729        | 19       |
| 2              | 990981       | 601590        | 19       |
| 3              | 989922       | 605086        | 19       |
| 4              | 986630       | 604268        | 19       |
| 5              | 983530       | 605045        | 19       |

## Summary of species examined

| Species                                        | Transcriptome | Genomic (experimental) | Genomic (database) |
|------------------------------------------------|---------------|------------------------|--------------------|
| <i>Desmodus rotundus</i> (vampire bat) (n = 4) | X             | X                      |                    |
| <i>Carollia brevicauda</i> (microbat) (n = 6)  | X             | X                      |                    |
| <i>Anoura cultrata</i> (microbat) (n = 1)      | X             |                        |                    |
| <i>Uroderma bilobatum</i> (microbat) (n = 1)   | X             |                        |                    |
| <i>Sturnira lilium</i> (microbat) (n = 1)      | X             | X                      |                    |
| <i>Pteropus vampyrus</i> (megabat) (n = 1)     |               | X                      |                    |
| <i>Pteropus rodricensis</i> (megabat) (n = 1)  |               | X                      |                    |
| <i>Rousettus aegyptiacus</i> (megabat) (n = 1) |               | X                      |                    |
| <i>Scapanus orarius</i> (coast mole) (n = 1)   | X             | X                      |                    |
| <i>Bos taurus</i> (cow) (n = 1)                | X             |                        | X                  |
| <i>Canis lupus</i> (dog)                       |               |                        | X                  |
| <i>Sus scrofa</i> (pig)                        |               |                        | X                  |
| <i>Mus musculus</i> (mouse) (n ≥ 6)            | X             |                        | X                  |
| <i>Rattus norvegicus</i> (rat)                 |               |                        | X                  |
| <i>Oryctolagus cuniculus</i> (rabbit)          |               |                        | X                  |
| <i>Loxodonta africana</i> (elephant)           |               |                        | X                  |
| <i>Homo sapiens</i> (human)                    |               |                        | X                  |
| <i>Macaca mulatta</i> (macaque)                |               |                        | X                  |

### Supplementary Figure 15

#### Compendium of animals examined

Top table indicates global coordinates at which bat species were collected. Bottom table summarizes all species examined, either through analysis of tissue samples and/or bioinformatically. Where relevant, the number of individual animals examined for each species is indicated in parenthesis.
